# Supplementary material
Source: PubMed Central journal article supplement (PMC4666547)
Supplement: NIHMS697389-supplement-supplement_1.pdf [file NIHMS697389-supplement-supplement_1.pdf]

92 **Table S1. Characteristics of the study population across New England for the years**  
 93 **2000-2008**

| <b>Characteristic</b>   | <b>N</b> | <b>%</b> |
|-------------------------|----------|----------|
| <b>Total population</b> | 2740308  | 100      |
| <b>Deaths</b>           | 836853   | 30.5     |
| <b>Sex</b>              |          |          |
| Male                    | 1158052  | 42.3     |
| Female                  | 1582256  | 57.7     |
| <b>Race</b>             |          |          |
| White                   | 2576263  | 94.0     |
| Black                   | 83444    | 3.1      |
| Asian                   | 22005    | 0.8      |
| Hispanic                | 19575    | 0.7      |
| Other                   | 39021    | 1.4      |
| <b>Age</b>              |          |          |
| 65-69                   | 611977   | 22.3     |
| 70-74                   | 521568   | 19       |
| 75-79                   | 514346   | 18.8     |
| 80-84                   | 476469   | 17.4     |
| 85-89                   | 353639   | 12.9     |
| >=90                    | 262309   | 9.6      |

94

95 **Table S2. Descriptive Statistics for temperature and temperature variability in**  
 96 **summer and winter across New England, 2000-2008**  
 97

|                 | Temperature<br>(°C) | Mean  | Median | SD   | Min   | Max   | Range | IQR  | Q1    | Q3    |
|-----------------|---------------------|-------|--------|------|-------|-------|-------|------|-------|-------|
| <b>Overall</b>  | <b>Summer mean</b>  | 16.39 | 16.34  | 1.16 | 1.75  | 33.34 | 31.59 | 1.60 | 15.57 | 17.17 |
|                 | <b>Winter mean</b>  | 2.35  | 2.68   | 2.88 | -7.47 | 12.20 | 19.67 | 4.03 | 0.38  | 4.41  |
|                 | <b>Summer SD</b>    | 2.46  | 2.45   | 0.33 | 0.00  | 4.50  | 4.50  | 0.44 | 2.23  | 2.67  |
|                 | <b>Winter SD</b>    | 3.55  | 3.48   | 0.64 | 0.00  | 7.56  | 7.56  | 0.85 | 3.10  | 3.95  |
| <b>Spatial</b>  | <b>Summer mean</b>  | 16.49 | 16.48  | 0.99 | 13.37 | 19.19 | 5.82  | 1.32 | 15.80 | 17.11 |
|                 | <b>Winter mean</b>  | 2.58  | 2.95   | 2.24 | -3.98 | 8.22  | 12.19 | 3.40 | 0.96  | 4.36  |
|                 | <b>Summer SD</b>    | 2.46  | 2.46   | 0.14 | 0.85  | 3.01  | 2.16  | 0.14 | 2.39  | 2.53  |
|                 | <b>Winter SD</b>    | 3.41  | 3.29   | 0.46 | 1.50  | 5.06  | 3.56  | 0.63 | 3.09  | 3.72  |
| <b>Temporal</b> | <b>Summer mean</b>  | 0.01  | 0.00   | 0.59 | -6.21 | 15.61 | 21.83 | 0.88 | -0.44 | 0.44  |
|                 | <b>Winter mean</b>  | -0.01 | -0.06  | 1.45 | -5.90 | 4.96  | 10.85 | 2.03 | -1.03 | 1.00  |
|                 | <b>Summer SD</b>    | 0.00  | 0.01   | 0.26 | -0.85 | 2.86  | 3.71  | 0.37 | -0.19 | 0.18  |
|                 | <b>Winter SD</b>    | 0.00  | 0.07   | 0.50 | -1.71 | 3.91  | 5.62  | 0.67 | -0.31 | 0.36  |

98

99

100 **Table S3. Correlation coefficients ( $r$ ) of the spatial and temporal variations for mean**  
 101 **temperature and temperature variability**  
 102

|                                | Summer mean | Winter mean | Summer SD | Winter SD | Summer mean <sup>s</sup> | Winter mean <sup>s</sup> | Summer SD <sup>s</sup> | Winter SD <sup>s</sup> | Summer mean <sup>t</sup> | Winter mean <sup>t</sup> | Summer SD <sup>t</sup> | Winter SD <sup>t</sup> |
|--------------------------------|-------------|-------------|-----------|-----------|--------------------------|--------------------------|------------------------|------------------------|--------------------------|--------------------------|------------------------|------------------------|
| <b>Summer mean</b>             | 1.00        | 0.56        | 0.43      | -0.37     | 0.86                     | 0.69                     | 0.56                   | -0.56                  | 0.51                     | -0.04                    | 0.19                   | 0.01                   |
| <b>Winter mean</b>             | 0.56        | 1.00        | 0.12      | -0.82     | 0.68                     | 0.84                     | 0.18                   | -0.80                  | -0.05                    | 0.54                     | 0.03                   | -0.37                  |
| <b>Summer SD</b>               | 0.43        | 0.12        | 1.00      | -0.02     | 0.31                     | 0.10                     | 0.48                   | -0.02                  | 0.32                     | 0.06                     | 0.88                   | -0.01                  |
| <b>Winter SD</b>               | -0.37       | -0.82       | -0.02     | 1.00      | -0.44                    | -0.64                    | -0.03                  | 0.67                   | 0.01                     | -0.51                    | -0.00                  | 0.74                   |
| <b>Summer mean<sup>s</sup></b> | 0.86        | 0.68        | 0.31      | -0.44     | 1.00                     | 0.80                     | 0.65                   | -0.65                  | -0.01                    | 0.00                     | -0.00                  | 0.00                   |
| <b>Winter mean<sup>s</sup></b> | 0.69        | 0.84        | 0.10      | -0.64     | 0.80                     | 1.00                     | 0.22                   | -0.95                  | -0.01                    | -0.00                    | -0.00                  | 0.00                   |
| <b>Summer SD<sup>s</sup></b>   | 0.56        | 0.18        | 0.48      | -0.03     | 0.65                     | 0.22                     | 1.00                   | -0.05                  | -0.00                    | 0.00                     | 0.00                   | 0.00                   |
| <b>Winter SD<sup>s</sup></b>   | -0.56       | -0.80       | -0.02     | 0.67      | -0.65                    | -0.95                    | -0.05                  | 1.00                   | 0.00                     | 0.00                     | 0.00                   | -0.01                  |
| <b>Summer mean<sup>t</sup></b> | 0.51        | -0.05       | 0.32      | 0.01      | -0.01                    | -0.01                    | -0.00                  | 0.00                   | 1.00                     | -0.08                    | 0.36                   | 0.02                   |
| <b>Winter mean<sup>t</sup></b> | -0.04       | 0.54        | 0.06      | -0.51     | 0.00                     | -0.00                    | 0.00                   | 0.00                   | -0.08                    | 1.00                     | 0.07                   | -0.69                  |
| <b>Summer SD<sup>t</sup></b>   | 0.19        | 0.03        | 0.88      | -0.00     | -0.00                    | -0.00                    | 0.00                   | 0.00                   | 0.36                     | 0.07                     | 1.00                   | -0.01                  |
| <b>Winter SD<sup>t</sup></b>   | 0.01        | -0.37       | -0.01     | 0.74      | 0.00                     | 0.00                     | 0.00                   | -0.01                  | 0.02                     | -0.69                    | -0.01                  | 1.00                   |

103 <sup>s</sup> stands for spatial variation;  
 104 <sup>t</sup> stands for temporal variation.

105 **Table S4. Percent increase in mortality (95% CI) for each 1 °C increase for both**  
 106 **seasonal mean temperature and temperature SD**

|                            | <b>Variable</b> | <b>Percent increase</b> | <b>95% CI</b> | <b><i>p</i>-value</b> | <b>Unit</b> |
|----------------------------|-----------------|-------------------------|---------------|-----------------------|-------------|
| <b>Unadjusted by SDs</b>   | Summer mean     | 1.7                     | (1.3,2.1)     | <.0001                | 1 °C        |
|                            | Winter mean     | -1.6                    | (-1.7,-1.4)   | <.0001                | 1 °C        |
| <b>Unadjusted by means</b> | Summer SD       | 2.2                     | (1.2,3.2)     | <.0001                | 1 °C        |
|                            | Winter SD       | 5.6                     | (5.0,6.2)     | <.0001                | 1 °C        |
| <b>Adjusted by SDs</b>     | Summer mean     | 1.0                     | (0.6,1.5)     | <.0001                | 1 °C        |
|                            | Winter mean     | -0.6                    | (-0.9,-0.3)   | <.0001                | 1 °C        |
| <b>Adjusted by means</b>   | Summer SD       | 1.3                     | (0.2,2.4)     | <.0001                | 1 °C        |
|                            | Winter SD       | 4.1                     | (3.0,5.2)     | <.0001                | 1 °C        |

107
